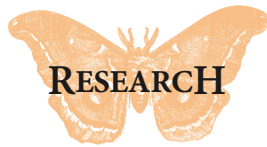

# Shadow Surveys: How Non-Target Identifications and Citizen Outreach Enhance Exotic Pest Detection

CHRIS LOONEY, TODD MURRAY, ERIC LAGASA, WARREN E. HELLMAN, AND STEVEN C. PASSOA

**ABSTRACT:** At least 70 exotic invertebrate pests have been newly detected in Washington State since 1990, based on records from the Washington State Department of Agriculture (WSDA) or other published accounts. Most of those species are apparently established. Pests were first detected in multiple ways, including formal surveys by regulatory agencies, accidental captures in formal surveys, and complaints or questions by average citizens. We assigned the 70 detections to four broad categories to better understand how exotic pest detections are made. Twenty species (28%) were detected as “targets” in a pest or commodity-focused survey performed by a regulatory agency. Fourteen species (20%) were first detected as non-targets, or “by-catch” in surveys for other taxa. Twenty-five species (36%) were first found by private citizens, and the remaining 11 (16%) were detected by non-regulatory biologists. These numbers are evidence of the value of non-target identifications and an educated and engaged public to exotic pest detection. The relative cost-to-benefit ratio of identifying most species collected in pest surveys and of eliciting and supporting engagement by private citizens is low, and both strategies can be important tools for protecting domestic natural and economic resources.

**KEYWORDS:** By-catch, exotic pest survey, cooperative extension

Exotic pest introductions and movement within North America continue to increase via global trade and domestic transport pathways. Although more than a million significant port interceptions have been made since 1984, numerous pests continue to invade the United States through accidental or deliberate transport (Kim and McPherson 1993, Haack 2001, McCullough et al. 2006, Krcmar 2008, Holmes et al. 2009). The costs of introduced pests are well documented and include threats to agriculture and forestry, home gardening, landscape aesthetics, and native ecosystems (Pimentel et al. 2005, Gandhi and Herms 2010, Aukema et al. 2011, Dosdall et al. 2011). Detecting an exotic pest can complicate export marketing of agricultural and natural resource commodities (Heather and Hallman 2008), and responding to exotic pest threats—established or not—has become a perennial task for natural resource industries, regulatory agencies, commodity groups, and citizens (Follett and Neven 2006, Paini et al. 2010).

Exotic pests are detected through a variety of mechanisms in the United States. The most widely used approach is targeted pest or commodity-based surveys conducted yearly by federal and state resource management or regulatory agencies. Surveys

are usually funded through a combination of state and federal money, especially through the Cooperative Agricultural Pest Survey program (CAPS) and §1007 of the Farm Bill, administered by the U.S. Department of Agriculture Animal and Plant Health Inspection Service (USDA-APHIS). These surveys target significant individual pest species (e.g., the cotton seed bug, *Oxycaenus hyalinipennis*, Hemiptera: Oxycarenidae), ecologically similar groups of pests (e.g., exotic wood borers), or groups of pests associated with a specific commodity (e.g., citrus pests) (see Table 1 for examples of regularly fielded surveys).

Risk-based assessments are used to identify potential survey targets, to most strategically allocate limited survey and detection resources, and to avoid disrupting or impeding international trade (NPB 1999, Heather and Hallman 2008). Survey targets are selected based on a combination of likelihood of introduction, likelihood of establishment, and the potential damage to economic and/or natural resources (NPB 1999, Passoa 2009, McCullough et al. 2006). Target-based approaches also dominate the screening protocols for agricultural pests; generally, being able to reject a collected specimen as a “non-target” (i.e., anything other than the target species), whether pestiferous or



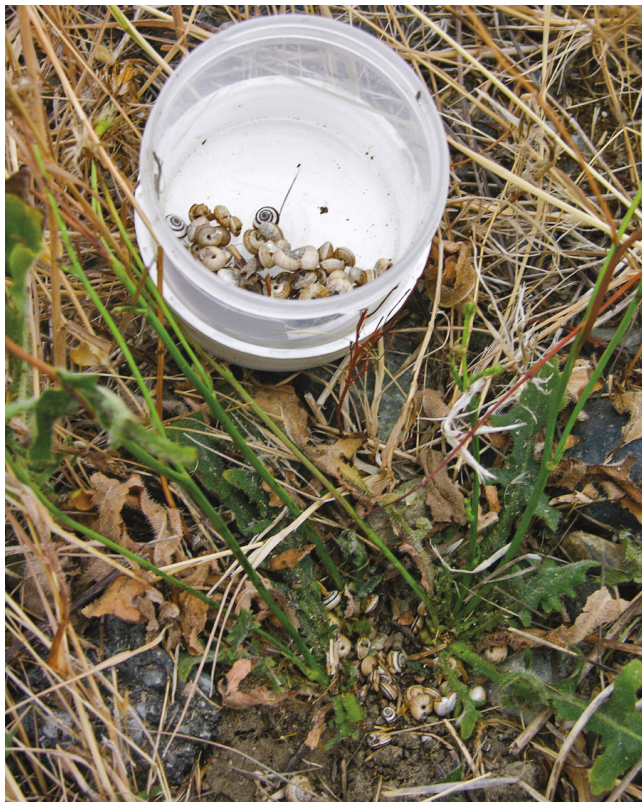

**Fig. 2.** An aggregation of *Cernuella virgata* was discovered by an alert technician in Tacoma, WA, during a wood-boring beetle survey.

an unusual abundance of snails at one field site. By taking the time to collect and identify these snails—in the midst of a beetle survey—a massive infestation of *Cernuella virgata* was discovered at a major port area (Fig. 2).

Predicting the pest potential of introduced species has an imperfect history. While life history traits and known pestiferous activity help identify many prominent threats (Kolar and Lodge 2001, 2002), some species will be missed (Bishop and Hutchings 2011). Neither *Solenopsis invictus* or *Myrmica rubra* are considered significant pests in their native range, yet they are problematic in North America (Buren et al. 1974, Groden et al. 2005). Possibilities for early detection of similar unanticipated invaders will be enhanced when administrative and financial support is given to broader analysis of exotic pest surveys, and the likelihood of detecting introduced species with as-yet small populations will be increased (Barry 2004, Hayes et al. 2005).

Identifying and collecting data from non-target catches also fills gaps in our current knowledge of regional faunas and helps develop taxonomic expertise and knowledge (Buchholz et al. 2011). Poor understanding of even the native fauna in general has been identified as a major barrier to effective early detection (Lodge et al. 2006). Dwindling taxonomic knowledge of many taxa is a significant problem, particularly for invertebrate groups (Lodge et al. 2006). Novel technological solutions will help alleviate this problem (e.g., deWaard et al. 2009, Crabo et al. 2012, Gilligan and Epstein 2012), but there will still be a need for skilled taxonomists, particularly when dealing with degraded specimens that are typical of agricultural pest surveys. Support for non-target examinations will not only result in new detections and expanded knowledge of regional fauna (e.g., Peterson

et al. 2007, Strange et al. 2011, Looney et al. 2012b), but provide continuous training challenges and skill development for taxonomists and identifiers.

The high costs of fielding a pest survey make it prudent to examine non-target catches in as many traps as possible. The majority of survey cost is allocated to purchasing traps, hiring field personnel, and trap deployment, checking, and retrieval. The in-house costs of processing traps and identifying target and non-target species are small by comparison. As an example, the WSDA Pest Program budgeted approximately \$1,435,000 to support field surveys for various arthropod pests in fiscal year 2012. That budget supported surveys for gypsy moth and other exotic defoliators, exotic grape pests, wood-boring insects, exotic snails, and experimental work with *Cerceris fumipennis* as a buprestid detection tool. Surveys ran from May through October, depending on the target, with more than 27,000 traps placed and more than 25,250 visual inspections conducted throughout the state. Approximately \$287,000 was budgeted for taxonomic and laboratory support, including federal funding for a Lepidoptera screening center that processed traps from six western states. This taxonomic capacity was about 16% of the total spent on detecting and delimiting arthropod pests, the majority of expenditures funding field operations and administrative support instead.

This was sufficient to examine thousands of traps and samples and identify more than 25,000 specimens. In our experience, examining non-targets does not always require significantly more time or money beyond that already budgeted for target screening. Most specimens from bucket or sticky card traps arrive in poor condition, and require dissection or other processing before they can be effectively screened. Once this occurs, identification is typically quickly and easily made by a trained taxonomist, and any difficult or unknown specimens can simply be put aside for follow-up analysis. Taking time to consider and subsequently analyze select non-target specimens enhances our collective biological knowledge, and also increases the return on spent public dollars.

The results reported here emphasize the value of involved and informed citizens. Fourteen of the exotic pests reported here came from private citizens. Land-grant universities are mandated by the 1914 Smith-Lever Act to provide extension and outreach activities, and generate a significant pool of trained volunteers and professional audiences to assist regulatory agencies in exotic pest detection. Participants in the WSU Master Gardener Program are often first to encounter a new pest, frequently at community workshops and plant diagnostic clinics where the general public submits plant and pest problems (e.g., Murray et al. 2016). In 2012, 4,895 Master Gardeners made more than 266,000 contacts through clinics, classes, and workshops. During the same year, the WSU Urban IPM Program and Pesticide Education Program offered education to more than 5,600 licensed pesticide applicators, including regular updates about new pest threats. These professional groups often encounter newly introduced pests and are regularly updated with new pest information and concerns at training events. During a 1991 class, a ranger at Peace Arch Park in Blaine, WA, learned of a European cherry pest in British Columbia: *Enarmonia formosana*, the cherry bark tortrix. The following day, the ranger

*continues on page 252*

**Table 1. Chronological list of exotic pests detected within Washington State between 1990 and 2014.**

| Order: Family               | Species                                          | Year Detected | Detection Pathway <sup>1</sup> | Notes / References                                                                                     |
|-----------------------------|--------------------------------------------------|---------------|--------------------------------|--------------------------------------------------------------------------------------------------------|
| Lepidoptera: Tortricidae    | <i>Enarmonia formosana</i> (Scopoli)             | 1991          | Public-WSDA                    | Park ranger detection                                                                                  |
| Lepidoptera: Tortricidae    | <i>Notocelia rosaecolana</i> (Doubleday)         | 1991          | WSDA-NT                        | <i>Enarmonia formosana</i> survey                                                                      |
| Lepidoptera: Yponomeutidae  | <i>Yponomeuta padella</i> (L.)                   | 1993          | WSDA Survey                    | <i>Yponomeuta padella</i> survey                                                                       |
| Lepidoptera: Gelechiidae    | <i>Recurvaria nanella</i> (Denis & Schiffmüller) | 1994          | WSDA Survey                    | Exotic apple defoliators survey                                                                        |
| Lepidoptera: Geometridae    | <i>Pasiphila rectangulata</i> (L.)               | 1994          | WSDA Survey                    | Exotic apple defoliators survey                                                                        |
| Lepidoptera: Geometridae    | <i>Hemithea aestivaria</i> (Hübner)              | 1994          | WSDA Survey                    | Exotic apple defoliators survey                                                                        |
| Lepidoptera: Tortricidae    | <i>Pandemis cerasana</i> (Hübner)                | 1994          | WSDA Survey                    | Exotic apple defoliators survey                                                                        |
| Lepidoptera: Tortricidae    | <i>Pandemis heparana</i> (Denis & Schiffmüller)  | 1994          | WSDA Survey                    | Exotic apple defoliators survey                                                                        |
| Lepidoptera: Tortricidae    | <i>Acleris holmiana</i> (L.)                     | 1994          | WSDA Survey                    | Exotic apple defoliators survey                                                                        |
| Lepidoptera: Tortricidae    | <i>Hedya nubiferana</i> (Haworth)                | 1994          | WSDA Survey                    | Exotic apple defoliators survey                                                                        |
| Lepidoptera: Tortricidae    | <i>Archips fuscocupreana</i> Walsingham          | 1995          | WSDA-NT                        | <i>Yponomeuta padella</i> survey                                                                       |
| Coleoptera: Curculionidae   | <i>Xyloterinus politus</i> (Say)                 | 1996          | WSDA-NT                        | <i>Tomicus piniperda</i> , <i>Ips typographus</i> , <i>Hylastes opacus</i> survey<br>Mudge et al. 2001 |
| Coleoptera: Curculionidae   | <i>Xyleborinus attenuatus</i> (Blandford)        | 1996          | WSDA-NT                        | <i>Tomicus piniperda</i> , <i>Ips typographus</i> , <i>Hylastes opacus</i> survey<br>Mudge et al. 2001 |
| Coleoptera: Curculionidae   | <i>Cyclorhipidion bodoanum</i> (Reitter)         | 1996          | WSDA-NT                        | <i>Tomicus piniperda</i> , <i>Ips typographus</i> , <i>Hylastes opacus</i> survey<br>Mudge et al. 2001 |
| Coleoptera: Elateridae      | <i>Melanotus cete</i> Candèze                    | 1996          | WSDA-NT                        | <i>Tomicus piniperda</i> , <i>Ips typographus</i> , <i>Hylastes opacus</i> survey                      |
| Hymenoptera: Tenthredinidae | <i>Pristiphora rufipes</i> Serville              | 1996          | Public-WSU Ext                 | Public complaint, ornamental damage<br>Looney et al. 2016                                              |
| Coleoptera: Elateridae      | <i>Agriotes obscurus</i> (L.)                    | 1997          | Biologist                      | Carabidae survey<br>Vernon and Päts 1997                                                               |
| Lepidoptera: Tineidae       | <i>Haplotinea ditella</i> (Pierce & Metcalfe)    | 1997          | WSDA-NT                        | <i>Enarmonia formosana</i> survey                                                                      |
| Lepidoptera: Depressariidae | <i>Carcina quercana</i> (Fabricius)              | 1997          | Public-WSU Ext                 | Public complaint, ornamental damage                                                                    |
| Lepidoptera: Tortricidae    | <i>Notocelia cynosbatella</i> (L.)               | 1997          | Biologist                      | General collecting activities                                                                          |
| Coleoptera: Micromalthidae  | <i>Micromalthus debilis</i> LeConte              | 1998          | Public-WSDA                    | Public complaint, nuisance pest<br>Mudge et al. 2001                                                   |
| Lepidoptera: Tortricidae    | <i>Gypsonoma aceriana</i> (Duponchel)            | 1998          | WSDA Survey                    | General exotic pest survey<br>Miller and LaGasa 2001                                                   |
| Hymenoptera: Tenthredinidae | <i>Nematus lipovskyi</i> Smith                   | 1998          | Public-WSU Ext                 | Public complaint, ornamental damage<br>Looney et al. 2016                                              |
| Lepidoptera: Tortricidae    | <i>Clepsis spectrana</i> (Treitschke)            | 1998          | WSDA-NT                        | <i>Pandemis heparana</i> survey                                                                        |
| Coleoptera: Chrysomelidae   | <i>Oulema melanopus</i> (L.)                     | 1999          | Public-WSU Ext                 | Grower detection                                                                                       |
| Coleoptera: Cerambycidae    | <i>Phymatodes testaceous</i> (L.)                | 1999          | ODA Survey                     | Wood-boring insect survey<br>LaBonte et al. 2005                                                       |
| Diptera: Tipulidae          | <i>Tipula oleracea</i> L.                        | 1999          | WSDA Survey                    | <i>Tipula oleracea</i> survey                                                                          |
| Hymenoptera: Vespidae       | <i>Polistes dominula</i> (Christ)                | 1999          | Biologist                      | Landolt and Antonelli 1999                                                                             |
| Lepidoptera: Argresthiidae  | <i>Argyresthia conjugella</i> Zeller             | 1999          | WSDA Survey                    | Exotic pest survey                                                                                     |
| Coleoptera: Elateridae      | <i>Agriotes lineatus</i> (L.)                    | 2000          | WSDA Survey                    | <i>Agriotes</i> spp. survey<br>Vernon et al. 2001                                                      |
| Lepidoptera: Tortricidae    | <i>Archips podana</i> (Scopoli)                  | 2000          | WSDA-NT                        | <i>Ostrinia nubilalis</i> survey                                                                       |
| Coleoptera: Chrysomelidae   | <i>Pyrrhalta viburni</i> (Paykull)               | 2001          | Public-WSU Ext                 | Public complaint, ornamental damage<br>Murray et al. 2016                                              |
| Hemiptera: Rhyparochromidae | <i>Rhyparochromus vulgaris</i> (Schilling)       | 2001          | Public-WSDA                    | Public complaint, nuisance<br>Henry 2004                                                               |
| Diptera: Culicidae          | <i>Ochlerotatus japonicus</i> (Theobald)         | 2001          | DOH Survey                     | Western Washington mosquito survey<br>Roppo et al. 2004                                                |
| Acari: Eriophyidae          | <i>Calepitrimerus vitis</i> (Nalepa)             | 2002          | Biologist                      | Prischmann and James 2005                                                                              |
| Lepidoptera: Noctuidae      | <i>Noctua pronuba</i> (L.)                       | 2004          | Public-WSU Ext                 | Slightly older specimens known from San Juan County<br>Crabo et al. 2012                               |

| Order: Family                | Species                                          | Year Detected | Detection Pathway <sup>1</sup> | Notes / References                                                                   |
|------------------------------|--------------------------------------------------|---------------|--------------------------------|--------------------------------------------------------------------------------------|
| Thysanoptera: Thripidae      | <i>Ceratothrips ericae</i> (Haliday)             | 2004          | USDA Survey                    | Northern border exotic pest survey                                                   |
| Stylommatophora: Hygromiidae | <i>Cernuella virgata</i> (Da Costa)              | 2005          | WSDA-NT                        | <i>Anoplophora chinensis</i> survey                                                  |
| Lepidoptera: Tortricidae     | <i>Cydia</i> sp. <sup>2</sup>                    | 2005          | WSDA-NT                        | <i>Ostrinia nubialis</i> survey<br>LaGasa and Passoa 2007                            |
| Stylommatophora: Hygromiidae | <i>Candidula intersecta</i> (Poiret)             | 2006          | WSDA Survey                    | Exotic snail survey                                                                  |
| Hemiptera: Oxycarenidae      | <i>Metopoplax ditomoides</i> (Costa)             | 2006          | Public-WSU Ext                 | Public complaint, bugs in walls                                                      |
| Hemiptera: Rhyparochromidae  | <i>Raglius alboacuminatus</i> (Goeze)            | 2006          | Public-WSDA                    | Public complaint, nuisance pest                                                      |
| Hymenoptera: Formicidae      | <i>Myrmica rubra</i> (L.)                        | 2006          | Public-WSU Ext                 | Public complaint, stinging ants in park <sup>3</sup>                                 |
| Lepidoptera: Sesiiidae       | <i>Synanthedon myopaeformis</i> (Borkhausen)     | 2006          | WSDA Survey                    | <i>Synanthedon myopaeformis</i> survey                                               |
| Hymenoptera: Tenthredinidae  | <i>Pristiphora geniculata</i> (Hartig)           | 2009          | Public-WSU Ext                 | Public complaint, ornamental damage<br>Looney et al. 2016                            |
| Thysanoptera: Thripidae      | <i>Thrips flavus</i> Schrank                     | 2006          | Biologist                      | General collecting activities                                                        |
| Coleoptera: Curculionidae    | <i>Trypodendron domesticum</i> (L.)              | 2007          | WSDA Survey                    | <i>Trypodendron</i> spp. survey                                                      |
| Diptera: Cecidomyiidae       | <i>Contarinia quinquenotata</i> (Loew)           | 2007          | Public-WSU Ext                 | Public complaint, ornamental damage                                                  |
| Lepidoptera: Noctuidae       | <i>Chloridea virescens</i> (Fabricius)           | 2007          | Biologist                      | Landolt 2009                                                                         |
| Lepidoptera: Noctuidae       | <i>Hecatera dysodea</i> (Denis & Schiffermüller) | 2007          | Biologist                      | Landolt et al. 2010                                                                  |
| Hemiptera: Tingidae          | <i>Stephanitis pyrioides</i> (Scott)             | 2007          | Public-WSU Ext                 | Public complaint, ornamental damage                                                  |
| Hymenoptera: Diprionidae     | <i>Neodiprion sertifer</i> (Geoffroy)            | 2008          | Public-WSDA                    | Question from pest control operator<br>Looney et al. 2016                            |
| Coleoptera: Scarabaeidae     | <i>Amphimallon majale</i> (Razoumowsky)          | 2008          | WSDA-NT                        | <i>Popillia japonica</i> survey                                                      |
| Coleoptera: Curculionidae    | <i>Pityophthorus juglandis</i> Blackman          | 2008          | Public-WSU Ext                 | Cranshaw 2011                                                                        |
| Lepidoptera: Sesiiidae       | <i>Synanthedon scitula</i> (Harris)              | 2008          | WSDA-NT                        | <i>Synanthedon myopaeformis</i> survey<br>Looney et al. 2012b                        |
| Coleoptera: Curculionidae    | <i>Ips paraconfusus</i> Lanier                   | 2009          | Public-WSU Ext                 | Public complaint, tree damage<br>Murray et al. 2013                                  |
| Diptera: Drosophilidae       | <i>Drosophila suzukii</i> (Matsumura)            | 2009          | Biologist                      | Research and extension station                                                       |
| Hemiptera: Pentatomidae      | <i>Halyomorpha halys</i> (Stål)                  | 2010          | Public-WSDA                    | Citizen responding to news story                                                     |
| Hymenoptera: Tenthredinidae  | <i>Monsoma pulveratum</i> (Retzius)              | 2010          | Biologist                      | General collecting activities<br>Looney et al. 2012c                                 |
| Lepidoptera: Argyresthiidae  | <i>Argyresthia pruniella</i> (Clerck)            | 2010          | WSDA Survey                    | <i>Argyresthia pruniella</i> survey                                                  |
| Lepidoptera: Galacticidae    | <i>Homadaula anisocentra</i> Meyrick             | 2010          | WSDA-NT                        | <i>Lobesia botrana</i> survey                                                        |
| Coleoptera: Curculionidae    | <i>Orchestes alni</i> (L.)                       | 2011          | Biologist                      | General collecting activities<br>Looney et al. 2012a                                 |
| Hymenoptera: Diprionidae     | <i>Gilpinia hercyniae</i> (Hartig)               | 2011          | Biologist                      | General collecting activities<br>Looney et al. 2016                                  |
| Coleoptera: Chrysomelidae    | <i>Lilioceris lili</i> (Scopoli)                 | 2012          | Public-WSU Ext                 | Public complaint, ornamental damage<br>Murray et al. 2016                            |
| Hymenoptera: Diprionidae     | <i>Diprion similis</i> (Hartig)                  | 2012          | Public-WSDA                    | Public complaint, tree damage<br>Looney et al. 2016                                  |
| Hymenoptera: Tenthredinidae  | <i>Heterarthrus vagans</i> (Fallén)              | 2012          | WSDA Survey                    | Exotic sawfly survey<br>Looney et al. 2016                                           |
| Hymenoptera: Tenthredinidae  | <i>Monostegia abdominalis</i> (Fabricius)        | 2013          | Public-WSU Ext                 | City parks employee noted insect outbreak on noxious weed host<br>Looney et al. 2016 |
| Coleoptera: Buprestidae      | <i>Agrilus cuprescens</i> (Menetries)            | 2014          | Public-WSDA                    | Citizen picture posted to bugguide.net<br>Westcott et al. 2015                       |
| Hemiptera: Lygaeidae         | <i>Arocatus melanocephalus</i> (Fabricius)       | 2014          | Public-WSU Ext                 | Public complaints, nuisance pests                                                    |
| Hemiptera: Pentatomidae      | <i>Nezara viridula</i> (L.)                      | 2014          | Public-WSDA                    | Multiple citizen questions about an un-recognized stink bug                          |

<sup>1</sup> Abbreviations are Public-WSDA: public detection first communicated to WSDA, Public-WSU-Ext: Public detection first communicated to WSU Extension, WSDA-NT: non-target detected in a WSDA survey, DOH: Washington Dpt. of Health, ODA: Oregon Dpt. of Agriculture.

<sup>2</sup> Initially identified as *Cydia coniferana*; recent molecular data suggest it may be a different introduced species.

<sup>3</sup> Wetterer and Radchenko (2011) note a specimen collected in 1988, previously unreported and housed in a collection in Florida.

examined the old flowering cherries at the park, discovered *E. formosana* activity, and alerted WSDA (Fig. 3).

Opportunities and support for extension programs have waned over the past several decades (McDowell et al. 2004). Most recently, extension programs have adapted to cuts during the Great Recession by increasing other revenue sources: accessing grants, charging fees, and establishing other funding partnerships (Serenari et al. 2013). Changing funding sources directly impacts the focus of the programs offered, which may threaten Master Gardener and similar education-based programs. Rather than eviscerate such programs, developing them and integrating new technologies can increase early detections and reduce response time.

The contribution of citizen surveyors has been formalized in the creation of several citizen-science survey programs. A citizen survey effort using *Cerceris fumipennis* as a tool to detect exotic buprestids generated one of the first two records of *Agrilus planipennis* in Connecticut (Rutledge et al. 2013). Smartphone apps (e.g., the Pacific Northwest Early Detection Network, <http://apps.bugwood.org>) and internet sites that encourage citizens to report exotic species are increasingly widespread, even if still nascent. The Texas Invasives program is just one example of many similar state initiatives that provide citizen scientists with training, collection equipment, and data management tools ([www.texasinvasives.org](http://www.texasinvasives.org)). In a five-year period, the program trained 702 data collectors and logged 8,466 species observations (Waitt and Gallo 2010). In addition to detection and range expansion, citizen scientists have provided significant contributions to exotic pest management. For example, amateur entomologists and citizen scientists helped determine the distribution of *Noctua pronuba* throughout the NE United States, as well as the host range of the viburnum leaf beetle, *Pyrrhalta viburni* (Passoa and Hollingsworth 1996, Weston et al. 2007). BugGuide (<http://bugguide.net>) is a continually expanding forum that connects citizens with expert and amateur taxonomists to help accurately identify insects, generating novel behavioral observations and expanding known ranges

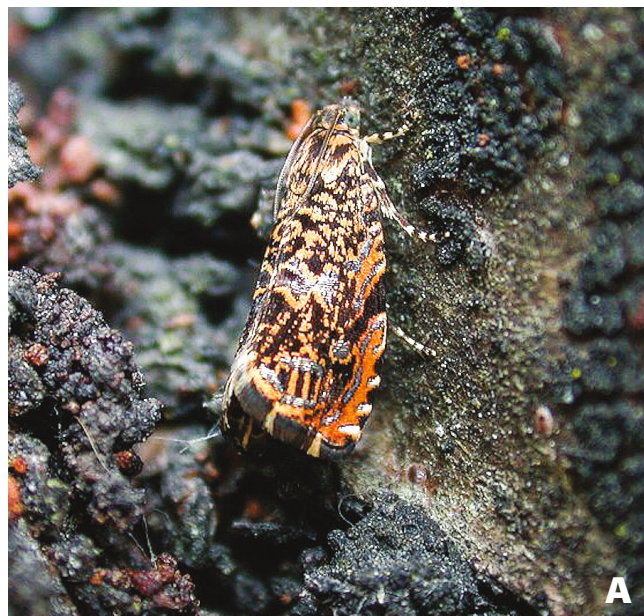

(e.g., Hamilton 2011, Strange et al. 2011, Looney et al. 2012c, Harrison et al. 2016).

The data we present here are limited in scope and raise many questions. To begin with, it's not clear if the detections made by examining non-target catches and those contributed by citizens are unique to Washington, although the potential value of the letter has been highlighted by other researchers (e.g., Dowell et al. 2016). In terms of non-target catches, the argument is at least partially semantic. "Non-target" is a moving target, and calling one bark beetle collected in a survey for a different bark beetle a "non-target" might be splitting hairs. The prominence of citizen detections in these data could merely indicate institutional gaps in Washington that create space for such discoveries. Other states may habitually field surveys with greater taxonomic breadth, or spend more time examining non-target catches, leaving limited opportunity for citizens to make first detections. Trends in state-level detection methods and the relationship between funding levels for citizen-based programs and exotic pest detection rates is a potentially rich and illuminating area for further exploration. A reviewer of an earlier draft also wondered if some taxa were more likely to be detected by citizens and others by regulatory specialists. It seems logical that showy and brightly colored insects would be easier for non-taxonomists to recognize than small and difficult-to-identify taxa. Even so, non-taxonomists frequently recognize other signs of exotic insects, such as population outbreaks or unusual plant damage (Mudge et al. 2001, Murray et al. 2013). Understanding the taxonomic breadth of citizen detections is a research question that begs for a thorough analysis in order to best marshal citizen contributions.

Despite the limitations of these data and the narrow focus on Washington State, it seems clear—indeed, nearly tautological—that when survey captures are screened for more than just pre-determined pests and communication between regulatory agencies and citizens is enhanced, the chances of detecting exotic species are higher. Opportunities to capitalize upon these detection pathways should be identified and further researched. Better understanding the different contributions of citizens and extension personnel, researchers, and regulators will

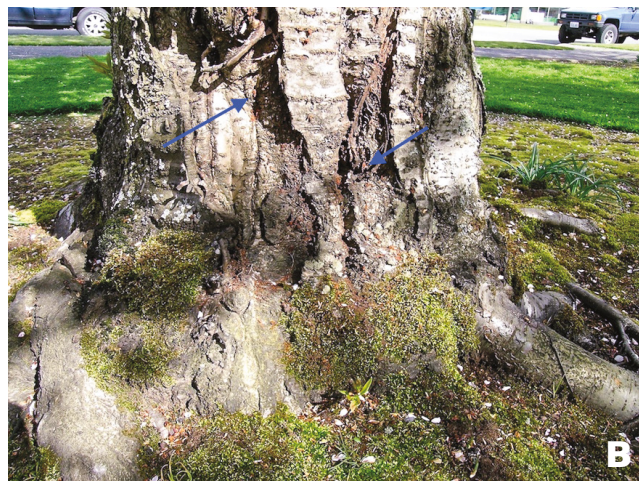

Fig. 3. *Enarmonia formosana*, an aggressive wood-boring tortricid moth (a), was discovered by a park ranger along the Washington-British Columbia border soon after the ranger learned about it in a pesticide relicensing lecture. Extensive feeding by this wood-boring moth (b) has devastated cherry trees in western Washington.

allow efficient incorporation of each in national and state-level pest detection programs, and perhaps improve communication between practicing scientists. Non-target detections are currently documented haphazardly, with a dearth of national databases to coordinate information collected by the various states and agencies (see Spears and Ramirez, 2015, for further discussion of systematically capturing data from by-catch). With strategic institutional and financial support, agencies can bring these irregular survey approaches out of the shadows and maximize our collective survey efforts.

## Acknowledgements

We are especially grateful to the many citizen scientists, landscaping professionals, and agency staff who provided the grist for this analysis. We thank Dr. Brad White, Dr. Jim Marra, and three anonymous reviewers for comments and observations that significantly improved the manuscript.

## References Cited

- Aukema, J.H., B. Leung, K. Kovacs, C. Chivers, K.O. Britton, J. Englin, S. Frankel, R.G. Hainght, T.P. Holmes, A.M. Liebhold, D.G. McCullough, and B. Von Holle. 2011. Economic impacts of non-native forest insects in the continental United States. *PLoS ONE* 6(9). doi:10.1371/journal.pone.0024587
- Barry, S. 2004. Sampling designs for pest monitoring programs; design considerations. Bureau of Rural Sciences, Australian Government Department of Agriculture, Fisheries, and Forestry, Canberra, ACT, Australia.
- Bishop, M.J., and P.A. Hutchings. 2011. How useful are port surveys focused on target pest identification for exotic species management? *Mar. Pollut. Bull.* 62: 36-42.
- Buchholz, S., M. Kreuels, A. Krongshage, H. Terlutter, and O. Finch. 2011. Bycatches of ecological field studies: bothersome or valuable? *Method. Ecol. Evol.* 2: 99-102.
- Brown, J.W., M.E. Epstein, T.M. Gilligan, S.C. Passoa, and J.A. Powell. 2010. Biology, identification, and history of the light brown apple moth, *Epiphyas postvittana* (Walker) (Lepidoptera: Tortricidae: Archipini) in California: an example of the importance of local faunal surveys to document the establishment of exotic insects. *Am. Entomol.* 56: 26-35.
- Buren, W.F., G.E. Allen, W.H. Whitcomb, F.E. Lennartz, and R.N. Williams. 1974. Zoogeography of the imported fire ants. *J. NY Entomol. Soc.* 82: 113-124.
- Cotterill, F.P.D., and W. Foissner. 2010. A pervasive denigration of natural history misconstrues how biodiversity inventories and taxonomy underpin scientific knowledge. *Biodivers. Conserv.* 19: 291-303.
- Coffelt, M.A., and P.B. Schultz. 1990. Development of an aesthetic injury level to decrease pesticide use against orangestriped oakworm (Lepidoptera: Saturniidae) in an urban pest management project. *J. Econ. Entomol.* 83: 2044-2049.
- Crabo, L., P. Hammond, M. Peterson, J. Shepard, and R. Zack. 2012. Pacific Northwest Moths. <http://pnwmoths.biol.wvu.edu/>
- Cranshaw, W. 2011. Recently recognized range extensions of the walnut twig beetle, *Pityophthorus juglandis* Blackman (Coleoptera: Curculionidae: Scolytinae), in the western United States. *Coleop. Bull.* 65: 48-49.
- deWaard, J.R., J.-F. Landry, B.C. Schmidt, J. Derhousoff, J.A. McLean, and L.M. Humble. 2009. In the dark in a large urban park: DNA barcodes illuminate cryptic and introduced moth species. *Biodivers. Conserv.* 18: 3825-3839.
- Dosdall, L.M., H. Cámarca, O. Olfert, S. Meers, S. Hartley, and J. Gavloski. 2011. Insect invasions of agroecosystems in the western Canadian prairies: case histories, patterns, and implications for ecosystem function. *Biol. Invasions* 13: 1135-1149.
- Dowell, R.V., R.J. Gill, D.R. Jeske, and M.S. Hoddle. 2016. Exotic terrestrial macro-invertebrate invaders in California from 1700 to 2015: an analysis of records. *Proc. Cal. Acad. Sci.* 63: 63-157.
- Follett, P.A., and L.G. Neven. 2006. Current trends in quarantine entomology. *Annu. Rev. Entomol.* 51: 359-85.
- Gandhi, K.J.K., and D.A. Herms. 2010. Direct and indirect effects of alien insect herbivores on ecological processes and interactions in forests of eastern North America. *Biol. Invasions* 12: 389-405.
- Gilligan, T.M., and M.E. Epstein. 2012. TortAI, Tortricids of Agricultural Importance to the United States (Lepidoptera: Tortricidae). Identification Technology Program (ITP), USDA/APHIS/PPQ/CPHST, Fort Collins, CO. <http://idtools.org/id/leps/tortai/>
- Groden, E., F.A. Drummond, J. Garnas, and A. Francoeur. 2005. Distribution of an invasive ant, *Myrmica rubra* (Hymenoptera: Formicidae), in Maine. *J. Econ. Entomol.* 98: 1774-1784.
- Haack, R.A. 2001. Intercepted Scolytidae (Coleoptera) at U.S. ports of entry: 1985-2000. *Int. Pest Manag. Rev.* 6: 253-282.
- Hamilton, K.G.A. 2011. What we have learned from shutterbugs. *Am. Entomol.* 57: 102-109.
- Harrison, T., C.A.E. Dean, K. Parks, and M.R. Berenbaum. 2016. *Depressaria depressana* (Fabricius) (Depressariidae), new to the Midwestern USA. *J. Lepid. Soc.* 70: 169-173.
- Hayes, K.R., R. Canaan, K. Neil, and G. Inglis. 2005. Sensitivity and cost considerations for the detection and eradication of marine pests in ports. *Mar. Pollut. Bull.* 50: 823-834.
- Heather, N.W., and G.J. Hallman. 2008. Pest management and phytosanitary trade barriers. CABI, Cambridge MA.
- Henry, T.J. 2004. Palearctic seed bugs, *Raglius alboacuminatus* (Goeze) and *Rhyparochromis vulgaris* (Schilling) (Hemiptera: Heteroptera: Rhyparochromidae), newly established in the United States. *P. Entomol. Soc. Wash.* 106: 513-522.
- Holmes T.P., J.E. Aukema, B. Von Holle, A. Liebhold, and E. Sills. 2009. Economic impacts of invasive species in forests: past, present, and future. *Ann. NY Acad. Sci.* 1162: 18-38.
- Jansen, G., and A. Radchenko. 2009. *Myrmica speciooides* Bondroit: a new invasive ant species in the USA? *Biol. Invasions* 11: 253-256.
- Kim, K.C., and B.A. McPheron. 1993. Evolution of insect pests: patterns of variation. Wiley, New York.
- Kolar, C.S., and D.M. Lodge. 2001. Progress in invasion biology: predicting invaders. *Trends Ecol. and Evol.* 16: 199-204.
- Kolar, C.S., and D.M. Lodge. 2002. Ecological predictions and risk assessment for alien fishes in North America. *Science* 298: 1233-1236.
- Krcmar, E. 2008. An examination of the threats and risks to forests arising from invasive alien species. Natural Resources Canada, Canadian Forest Service, Pacific Forestry Centre Information Report BC-X-415.
- LaBonte, J.R. 2011. *Nebria brevicollis* (Fabricius, 1792) in North America: benign or malign? (Coleoptera, Carabidae, Nebriini). *ZooKeys* 147: 497-543. doi:10.3897/zookeys.147.2119.
- LaGasa, E.H., and S. Passoa. 2007. First report of the Palearctic species *Cydia coniferana* (Tortricidae) in the western United States. *J. Lepid. Soc.* 61: 172-175.
- Landolt, P.J., and A. Antonelli. 1999. The paper wasp *Polistes dominulus* (Christ) (Hymenoptera: Vespidae) in the State of Washington. *Pan-Pac. Entomol.* 75: 58-59.
- Landolt, P.J. 2009. New geographic records for tobacco budworm, *Heliothis virescens* (Fabricius) (Lepidoptera: Noctuidae), in the Pacific Northwest. *Pan-Pac Entomol.* 84: 246-248.
- Landolt, P.J., R.A. Worth, and R.S. Zack. 2010. First report of *Hecatera dysodea* (Denis and Schiffermüller) (Lepidoptera: Noctuidae) in the Pacific Northwest of the United States. *J. Lepid. Soc.* 64: 192-196.
- Looney, C., L.M. Humble, and W. Cranshaw. 2012. *Orchestes alni* (L.) (Coleoptera: Curculionidae): new records from western North America with notes on parasitoids. *Coleop. Bull.* 66: 63-66.

- Looney, C., E. LaGasa, and S. Passoa. 2012.** First records of the dogwood borer, *Synanthedon scitula* (Harris) (Sesiidae), in the Pacific Northwest: a potential threat to ornamental and fruit tree growers. *J. Lepid. Soc.* 66: 171-174.
- Looney, C., K. Sheehan, B. Bai, R. Flowers, G. Kohler, E. LaGasa, A.E. McKorney, D.R. Smith. 2012.** Distribution of a potential new forest pest, *Monsoma pulveratum* (Hymenoptera: Tenthredinidae), in the Pacific Northwest states. *Northwest Sci.* 86: 342-345.
- Looney, C., D.R. Smith, S.J. Collman, D.W. Langor, and M.A. Peterson. 2016.** Sawflies (Hymenoptera: Symphyta) newly recorded from Washington State. *J. Hymenop. Res.* 49: 129-159. doi: 10.3897/JHR.49.7104
- Lodge, D.M., S. Williams, H.J. Macisaac, K.R. Hayes, B. Leung, S. Reichard, R.N. Mack, P.B. Moyle, M. Smith, D.A. Andow, J.T. Carlton, and A. McMichael. 2006.** Biological invasions: recommendations for U.S. policy and management. *Ecol. App.* 16: 2035-2054.
- McCullough, D.G., T.T. Work, J.F. Cavey, A.M. Liebhold, and D. Marshall. 2006.** Interceptions of nonindigenous plant pests at US ports of entry and border crossings over a 17-year period. *Biol. Invasions* 8: 611-630.
- McDowell, G. 2004.** Is extension an idea whose time has come and gone? *J. Extension.* 42(6). <http://www.joe.org/joe/2004december/comm1.php>
- Magarey, R.D., M. Colunga-Garcia, and D.A. Fieselmann. 2009.** Plant biosecurity in the United States: roles, responsibilities, and information needs. *BioScience* 59: 875-884.
- Miller, W.E., and E.H. LaGasa. 2001.** First report of *Gypsonoma aceriana* (Duponchel) (Lepidoptera: Tortricidae), an old world poplar pest, in North America. *P. Entomol. Soc. Wash.* 103: 1020-1022.
- Mudge, A.D., J.R. LaBonte, K.J.R. Johnson, and E.H. LaGasa. 2001.** Exotic woodboring Coleoptera (Micromalthidae, Scolytidae) and Hymenoptera new to Oregon and Washington. *P. Entomol. Soc. Wash.* 103: 1011-1019.
- Murray, T.A., G.R. Kohler, and E.A. Willhite. 2013.** *Ips paraconfusus* Lanier (Coleoptera: Curculionidae): new records of the California five-spined Ips from Washington State and the Columbia River Gorge in Oregon. *Coleopterists Bull.* 67(1): 28-31.
- Murray, T., C. Looney, E. LaGasa, and S.J. Collman. 2016.** Distribution of two invasive leaf beetles (Chrysomelidae), *Pyrrhalta viburni* (Paykull) and *Lilioceris lili* (Scopoli), in Washington State. *Coleop. Bull.* 70: 368-371.
- National Plant Board. 1999.** Safeguarding American plant resources: a stakeholder review of the APHIS-PPQ safeguarding system. <http://www.aphis.usda.gov/>
- Paini, R., S.P. Worner, D.C. Cook, P.J. De Barro, and M.B. Thomas. 2010.** Threat of invasive pests from within national borders. *Nature Communications* 1: 115 doi: 10.1038/ncomms1118
- Passoa, S. 2009.** Characters and techniques for identifying Lepidoptera of quarantine significance to the southern United States from USDA/APHIS/PPQ CAPS programs (abstract). In Hodges, A.C., and J. C. Morse. Southern Plant Diagnostic Network Invasive Arthropod Workshop, May 7-9, 2007. *J. Insect Sci.* 9: 10-11.
- Passoa, S., and C.S. Hollingsworth. 1996.** Distribution, identification, and rate of spread of *Noctua pronuba* (Lepidoptera: Noctuidae) in the northeastern United States. *Entomol. News* 107: 151-160.
- Pimentel, D., R. Zuniga, and R. Morrison. 2005.** Update on the environmental and economic costs associated with alien-invasive species in the United States. *Ecol. Econ.* 52: 273-288.
- Peterson M., E.H. LaGasa, S. Passoa, G.S. Robinson, and D. Holden. 2007.** First report of *Oecophora bractella* (L.) (Oecophoridae) in North America. *J. Lepid. Soc.* 6: 165-171.
- Prischmann, D.A., and D.G. James. 2005.** New mite records (Acari: Eriophyidae, Tetranychidae) from grapevines in Oregon and Washington. *Inter. J. Acarology.* 31: 289-291.
- Rabaglia, R.J., D. Duerr, R. Acciavatti, and I. Ragenovich. 2008.** Early detection and rapid response for non-native bark and ambrosia beetles. USDA Forest Service, Forest Health Protection, 1-12.
- Raupp, M.J., J.A. Davidson, C.S. Koehler, C.S. Sadof, and K. Reichelderfer. 1988.** Decision-making considerations for aesthetic damage caused by pests. *Bull. Entomol. Soc. Am.* 34, 27-32.
- Roppo, M.R., J.L. Lilja, F.A. Maloney, and W.J. Sames. 2004.** First occurrence of *Ochlerotatus japonicus* in the state of Washington. *J. Am. Mosq. Contr. Assoc.* 20: 83-84.
- Rutledge, C.E., M.K. Fierke, P.D. Careless, and T. Worthley. 2013.** First detection of *Agrilus planipennis* in Connecticut made by monitoring *Cerceris fumipennis* (Crabronidae) colonies. *J. Hymenop. Res.* 32: 75-81. doi: 10.3897/jhr.32.4865
- Serenari, C., M.N. Peterson, R.E. Bardon, and R.D. Brown. 2013.** The impacts of the Great Recession on state natural resource extension programs. *J. Extension.* 51(4). <http://www.joe.org/joe/2013august/all.php>
- Spears, L.R., and R.A. Ramirez. 2015.** Learning to love leftovers: using by-catch to expand our knowledge in entomology. *American Entomologist* 61: 168-173.
- Stephenson, B.P., G.S.C. Gill, J.L. Randall, and J.A. Wilson. 2003.** Biosecurity approaches to surveillance and response for new plant pest species. *N Z Plant Protect.* 56: 5-9.
- Strange, J.P., J.B. Koch, V.H. Gonzales, L. Nemelka, and T. Griswold. 2011.** Global invasion by *Anthidium manicatum* (Linnaeus) (Hymenoptera: Megachilidae): assessing potential distribution in North America and beyond. *Biol. Invasions* 13: 2115-2133.
- Sullivan, M., and E. Jones. 2010.** Grape commodity-based survey guidelines. <http://caps.ceris.purdue.edu/dmm/88>
- Sullivan, M., and T. Kalaris. 2012.** Stone fruit commodity-based survey guidelines. <http://caps.ceris.purdue.edu/dmm/1276>
- USDA. 2013.** Cooperative Agricultural Pest Survey (CAPS) 2014 national survey guidelines. [https://caps.ceris.purdue.edu/survey\\_guidelines/2014](https://caps.ceris.purdue.edu/survey_guidelines/2014)
- Vernon, B., and P. Päts. 1997.** Distribution of two European wireworms, *Agriotes lineatus* and *A. obscurus* in British Columbia. *J. Entomol. Soc. BC* 94: 59-61.
- Vernon, B., E. LaGasa, and H. Philip. 2001.** Geographic and temporal distribution of *Agriotes obscurus* and *A. lineatus* (Coleoptera: Elateridae) in British Columbia and Washington as determined by pheromone trap surveys. *J. Entomol. Soc. BC* 98: 257-265.
- Waitt, D.E., and T. Gallo. 2010.** Invaders of Texas: a citizen science program to detect and report invasive species, five-year report. [http://www.texasinvasives.org/invaders/Trainer\\_Resources/IOT\\_FiveYearReport.pdf](http://www.texasinvasives.org/invaders/Trainer_Resources/IOT_FiveYearReport.pdf)
- Waugh, J. 2009.** Neighborhood watch: early detection and rapid response to biological invasion along US trade pathways. Gland, Switzerland: IUCN.
- Westcott, R.L., C. Looney, and M. Asche. 2005.** *Agrilus cuprescens* (Ménétries), rose stem girdler (Coleoptera: Buprestidae), discovered in the state of Washington. *Coleop. Bull.* 69: 275-279.
- Weston, P.A., G. Desurmont, and E.R. Hoebke. 2007.** *Viburnum* leaf beetle: biology, invasion history in North America and management options. *Am. Entomol.* 53: 96-101.
- Wetterer, J.K., and A.G. Radchenko. 2011.** Worldwide spread of the ruby ant, *Myrmica rubra* (Hymenoptera: Formicidae). *Myrmecological News* 14: 87-96.
- Chris Looney**, Washington State Dept. of Agriculture, 1111 Washington St. SE, Olympia, Washington, 98504; **Todd Murray**, Agricultural and Natural Resources Extension Program Unit, Washington State University College of Agriculture, Human, and Natural Resource Sciences, Hulbert Hall, Room 411, Pullman, WA 99164; **Eric LaGasa**, Washington State Dept. of Agriculture, 1111 Washington St. SE, Olympia, Washington, 98504; **Warren E. Hellman**, Premium Northwest, 1009 N 42nd St., Seattle, WA 98103; **Steven C. Passoa**, United States Department of Agriculture, Animal and Plant Health Inspection Service, Plant Protection and Quarantine, USDA Forest Service Northern Research Station and The Ohio State University, 1315 Kinnear Road, Columbus, OH 43212.

DOI: 10.1093/ae/tmw063
